# Supplementary material for: A comparison of RS4-type resistant starch to RS2-type resistant starch in suppressing oxidative stress in high-fat-diet-induced obese rats
Source: Royal Society of Chemistry journal article supplement (doi:10.1039/c6fo01225f), 2016-11-22
Supplement: c6fo01225f1.pdf [file c6fo01225f1.pdf]

---

**TS1** Primer sequences used for PCR analysis

---

| Gene         | Accession number | Primer sequence (5'-3') |                       | Annealing temperature |
|--------------|------------------|-------------------------|-----------------------|-----------------------|
|              |                  | Forward primer          | Reverse primer        |                       |
| 18S          | -                | AAACGGCTACCACATCCAAG    | TTGCCCTCCAATGGATCCT   | 60                    |
| <i>ACC</i>   | NM_022193        | CAACCACTACGGCATGACTCA   | CGCAGAAGCAGCCCATTACTT | 60                    |
| <i>FAS</i>   | NM_017332        | TGCTCCCAGCTGCAG         | GCCCAGTAGCTCTGGGTGTA  | 60                    |
| <i>Acox1</i> | NM_017340        | CAAGGAGAGTGCTACGGGTTA   | TTCAGGTAGCCGTTATCCAT  | 58                    |
| <i>SREBP</i> | XM_213329        | GCAAGGCCATCGACTACATC    | TTTCATGCCCTCCATAGACAC | 60                    |
| <i>Acly</i>  | NM_016987        | GCAGACCAGAAGGGCGTGAC    | CACACTGCCTGGGCGATACAG | 64                    |
| <i>Fads1</i> | NM_053445        | GTTTGTGTGGGTGACGCAGAT   | TTGAAGGCTGACTGGTGAACG | 60                    |

---

---

---

|                                |                |                       |                       |      |
|--------------------------------|----------------|-----------------------|-----------------------|------|
| <i>Gpam</i>                    | NM_017274      | CCTGTGGGCATCTCGTATGAT | TTCCGCAGCATTCTGATAAC  | 60   |
| <i>Dgat1</i>                   | NM_053437      | CAGATGGGGCTGCTGCTACAT | GGCGGCACCACAGATTGACAT | 60   |
| <i>PPAR<math>\gamma</math></i> | NM_001127330.2 | GCCCTTTGGTGACTTTATGG  | CAGCAGGTTGTCTTGGATGT  | 57.8 |
| <i>LXR<math>\alpha</math></i>  | NM_001285517.1 | GCACGCTACATTTGCCATAG  | CCTGCTCCTCTTCTTGACG   | 59.7 |
| <i>HMGR</i>                    | NM_008255.2    | TGTGGGAACGGTGACACTTA  | CTTCAAATTTGGGCACTCA   | 55.7 |
| <i>FATP1</i>                   | NM_011977.3    | GTGCGACAGATTGGCGAGTT  | GCGTGAGGATACGGCTGTTG  | 55.9 |
| <i>FABP4</i>                   | NM_024406.2    | CCTTTGTGGGGACCTGGAA   | TGACCGGATGACGACCAAGT  | 55.0 |
| <i>Gsta2</i>                   | NM_008182.3    | GGAGAGAGCCCTGATTGACA  | TTCAAAGGCAGGCAAGTACC  | 59.8 |

---

---

---

|               |                |                           |                          |      |
|---------------|----------------|---------------------------|--------------------------|------|
| <i>Gsta3</i>  | NM_000847.4    | GGGAAGCCAGTCCTTCACTA      | GGTCATCCCGAGTTTTCAGA     | 58.8 |
| <i>Gstm2</i>  | NM_008183.3    | TTCGCTGTTCTGGAGTAT        | TTGCTCTGGGTGATCTTG TG    | 57.8 |
| <i>Nqo1</i>   | NM_000903.2    | CGCAGAGAGGACATCATTCA      | CGCCAGAGATGACTCAACAG     | 58.8 |
| <i>Gclc</i>   | NM_010295.2    | CTGGGGAGTGATTTCTGCAT      | AGATCTCCGTGTCGATGGTC     | 58.8 |
| <i>Gclm</i>   | NM_008129.4    | TGTGTGATGCCACCAGATTT      | GCTTTTCACGATGACCGAGT     | 56.8 |
| <i>VEGF</i>   | NM_001025250.3 | GTATATCTTCAAGCCGTCCTGTGTG | GATCCGCATGATCTGCATAGTGAC | 62.0 |
| <i>Egfr</i>   | NC_000077.6    | ACAGCAAGGCTTCTTCAACAGC    | GTCTTCTTTGACACGGCAGCTC   | 60   |
| <i>Igfbp1</i> | NM_010442.2    | GACCTCAAGAAATGGAAGGAGCC   | CCATTCTTGTTGCAGTTTGGCAG  | 61   |

---

---

---

|              |                |                         |                       |      |
|--------------|----------------|-------------------------|-----------------------|------|
| <i>Pml</i>   | NC_000077.6    | TCAAGGCCTTGGATGAGAGCC   | CGGAACTTGCTTCCCGGTTTC | 61.9 |
| <i>GAPDH</i> | NM_001311088.1 | CCTTCATTGACCTCAACTACATG | CTTCTCCATGGTGGTGAAGAC | 60   |

---

---

**TS2** Changes on body weight of rats within six weeks in four groups

| Groups | 0W            | 1w             | 2W             | 3W             | 4W            | 5W            | 6W             |
|--------|---------------|----------------|----------------|----------------|---------------|---------------|----------------|
| NC     | 322.26±16.02a | 392.29±24.03b  | 415.43±25.73bc | 441.46±31.70bc | 445.31±31.64b | 454.51±27.58b | 470.96±30.64c  |
| MC     | 336.81±20.88a | 430.25±32.20a  | 460.90±40.85a  | 491.23±40.99a  | 515.84±44.57a | 550.66±43.94a | 563.04±49.20a  |
| HAS    | 335.43±15.89a | 410.38±22.81ab | 434.89±27.93ab | 466.14±34.18ab | 477.35±28.61b | 499.69±36.02b | 512.99±38.98b  |
| EHAS   | 331.63±21.10a | 366.94±23.68b  | 403.11±26.87c  | 425.31±32.39c  | 450.94±38.08b | 488.24±44.21b | 488.69±43.87bc |

NC: Normal Control, MC: Model Control, HAS: High Amylose Starch, EHA: Esterified High Amylose Starch. Different lowercase letters above the same column indicate a significant difference ( $p \leq 0.05$ ); the results are the average value of three replicates  $\pm$  standard deviation.

---

**TS3** Changes in Perirenal fat, epididymal fat and body fat ratio of rats after six week period in the four groups

| Groups | Perirenal fat (g) | Epididymal fat (g) | Body fat ratio (%) |
|--------|-------------------|--------------------|--------------------|
| NC     | 12.26±2.14b       | 7.09±1.12b         | 4.11±0.58b         |
| MC     | 24.31±2.65a       | 14.27±2.11a        | 6.85±1.07a         |
| HAS    | 19.33±2.16ab      | 10.68±1.50ab       | 5.85±0.79a         |
| EHAS   | 16.71±4.07ab      | 10.62±2.93ab       | 5.59±0.86ab        |

NC: Normal Control, MC: Model Control, HAS: High Amylose Starch, EHA: Esterified High Amylose Starch. Different lowercase letters above the same column indicate a significant difference ( $p \leq 0.05$ ); the results are the average value of three replicates  $\pm$  standard deviation.
